# Supplementary material for: Adsorptive denitrogenation of model fuel with silica gel
Source: Royal Society of Chemistry journal article supplement (doi:10.1039/d4se00574k), 2024-01-01
Supplement: d4se00574k1.pdf [file d4se00574k1.pdf]

# Supporting Information

## Adsorptive Denitrogenation of Model Fuel with Silica Gel

Peipei Wang<sup>a</sup>, Jian Liu<sup>a</sup>, Difan Zhang<sup>a</sup>, Daniel Chambers<sup>b</sup>, Shuyun Li<sup>a</sup>, Daniel Santosa<sup>a</sup>

<sup>a</sup>. Pacific Northwest National Laboratory, Richland, WA 99354, USA. \*E-mail: daniel.santosa@pnl.gov

<sup>b</sup>. Northeastern University, Boston, MA 02115, USA

### 1. Chemicals and Materials

Pyridine, Indole, Decane, and Methanol were all bought from Sigma Aldrich and used without further purification. The Zeolite Y and Zeolite Beta, both 12 x 30 mesh, were procured from Guild. Zeolite 4A in 4-8 mesh form was sourced from Sigma Aldrich. Activated carbon pellets were acquired from Calgon. Amberlyst 15, 16, 36 and 45, all with approximately 50 % moisture content (in H<sup>+</sup> form), were obtained from Sigma Aldrich. Silica Gel S736-1 (grade 636, 35-60 mesh) and S745-1 (grade 645, 60-100 mesh) were purchased from Fisher Scientific. Prior to use, all adsorbents underwent a drying process in a 110 °C vacuum oven for two days and were subsequently stored in a desiccator. The jet fraction (150 °C-250 °C) obtained from the distillation of biocrude was collected and subjected to testing.

### 2. Characterization of NCC

GC-FID Samples were analyzed using an Agilent 6890GC equipped with a flame ionizing detector. The column was an Agilent HP-5MS 30m x 0.25mm x 0.25um film thickness with a carrier gas of helium at 1.0 mL/min. Oven temperature was initially held for 1 min at 40 °C, ramped at 10 °C/min to 180 °C, then ramped at 20 °C/min with a final temperature of 230 °C. The inlet was heated at 260 °C and 1uL of sample was injected using a 5:1 split. Trace N was analyzed on Elementar trace SN combustion analyzer. Nitrogen adsorption-desorption isotherms and pore structure were analyzed by N<sub>2</sub> physisorption at 77 K with an automatic gas sorption system: Quadrasorb EVO/SI Gas Sorption System from Quantachrome Instruments. NH<sub>3</sub>-TPD measurements were carried out on a conventional flow-type apparatus with a TCD detector. The supported samples (about 100 mg) were added into a U-tube reactor, blown out under 30 ml/min helium at 10 C/min heating rate until to 200 °C, treated in the helium stream at 200 °C for 2 h.

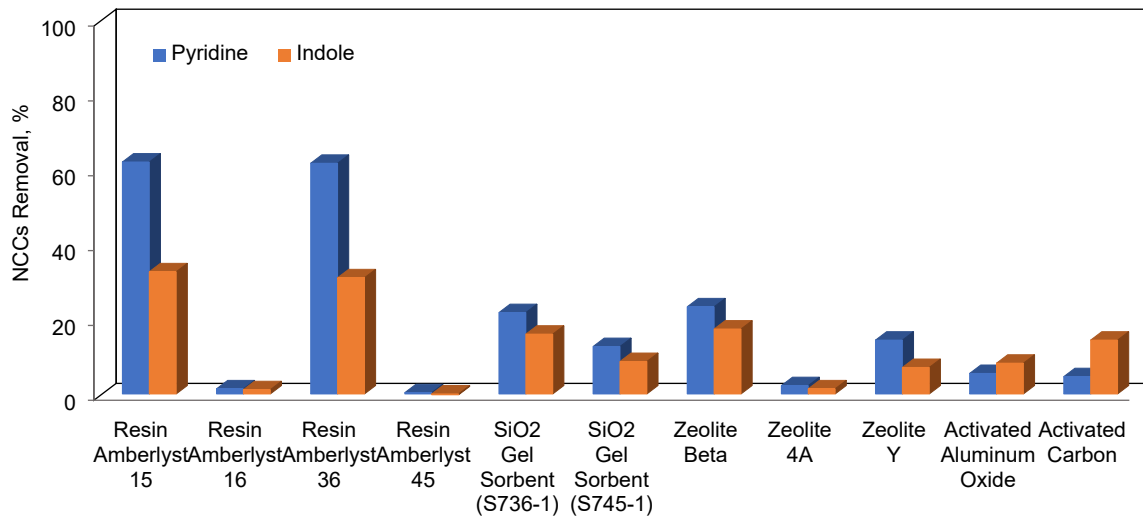

**Figure S1.** Sorbent screening with 1500 ppm N in Decane as mimic feed, 1000 ppm N from pyridine and 500 ppm N from Indole, fuel/adsorbent 100:1, 40 °C, 24 h.

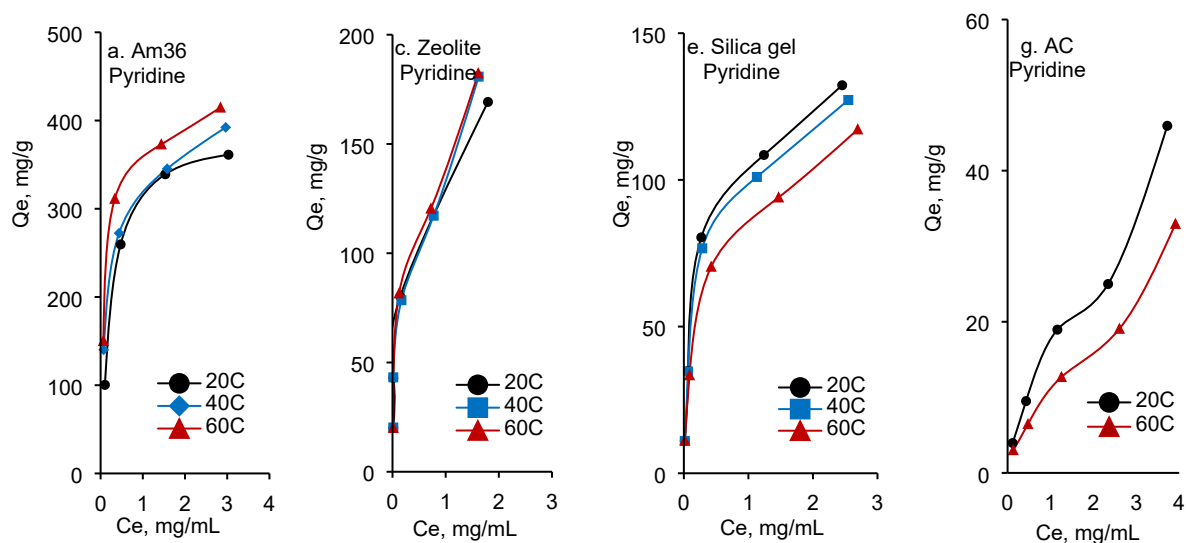

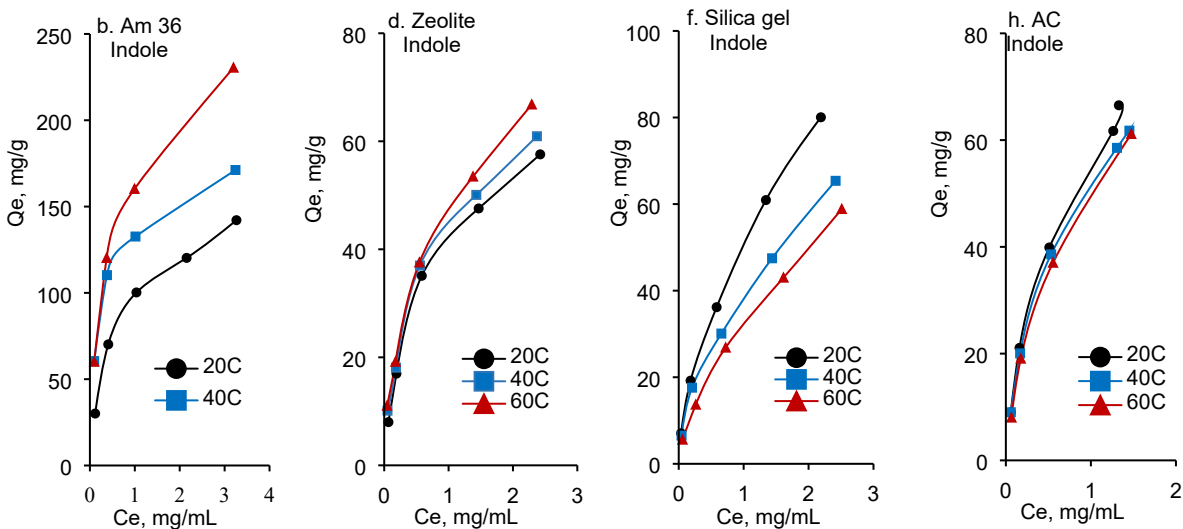

**Figure S2.** Equilibrium adsorption isotherms of Pyridine and Indole adsorption over Amberlyst 36 (a, b), Zeolite (c, d), Silica gel (e, f) and Activated Carbon (g, h).

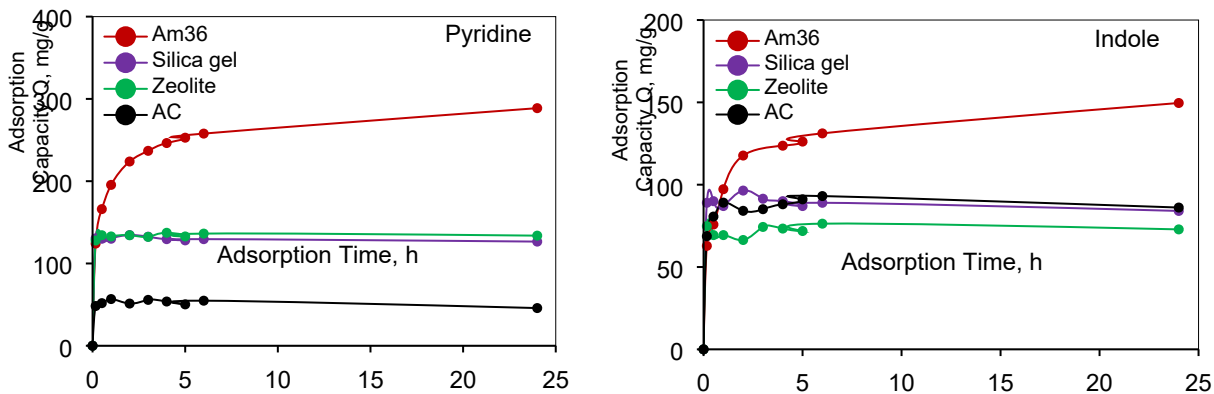

**Figure S3.** Effect of adsorption time on the adsorbed amounts of Pyridine and Indole. The initial concentration of pyridine and indole in mimic fuel was 1000 ppm N from pyridine, 500 ppm N from indole, Surrogate Fuel/Adsorbent = 50:1, 20 °C.

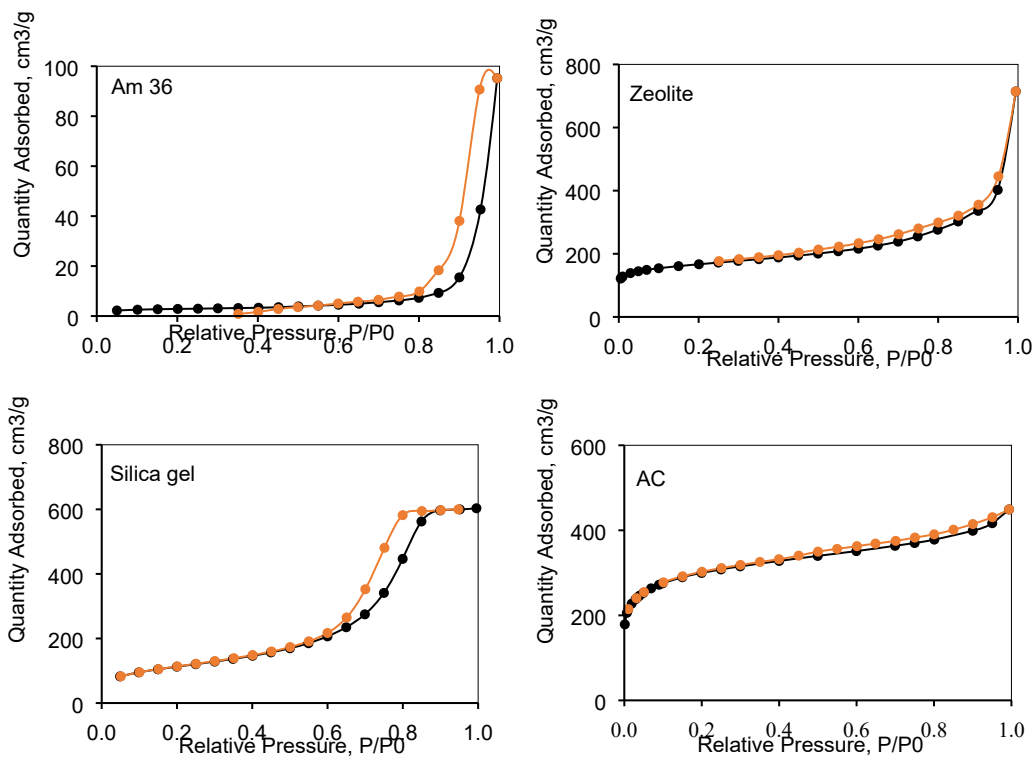

**Figure S4.** N<sub>2</sub> adsorption isotherms for Amberlyst 36, Zeolite, Silica gel and Activated carbon. Black curve represents adsorption, yellow curve represents desorption.

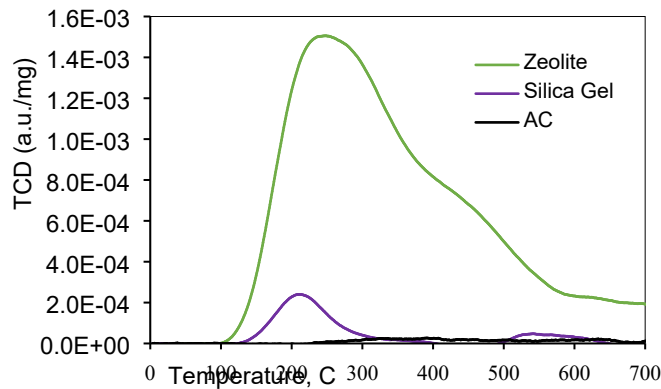

**Figure S5.** NH<sub>3</sub>-TPD curves of Zeolite, silica gel and activated carbon.

**Table S1.1** Kinetic fitting (Pyridine) for Silica gel

| Kinetic Models        | Parameters                                   | Amberlyst 36       | Silica gel         | Zeolite Beta       | Activated Carbon   |
|-----------------------|----------------------------------------------|--------------------|--------------------|--------------------|--------------------|
| Pseudo- first - order | $K_1$ ( $\text{min}^{-1}$ )                  | 0.08               | 0.12               | 0.21               | 0.14               |
|                       | $R^2$                                        | 0.79               | 0.92               | 0.98               | 0.92               |
| Pseudo-second-order   | $K_2$ ( $\text{g mg}^{-1} \text{min}^{-1}$ ) | $1 \times 10^{-6}$ | $9 \times 10^{-6}$ | $3 \times 10^{-6}$ | $2 \times 10^{-6}$ |
|                       | $R^2$                                        | 0.86               | 0.98               | 0.99               | 0.84               |

**Table S1.2** Kinetic fitting (Indole) for Silica gel

| Kinetic Models        | Parameters                                   | Amberlyst 36       | Silica gel         | Zeolite Beta       | Activated Carbon   |
|-----------------------|----------------------------------------------|--------------------|--------------------|--------------------|--------------------|
| Pseudo- first - order | $K_1$ ( $\text{min}^{-1}$ )                  | 0.05               | 0.35               | 0.47               | 0.13               |
|                       | $R^2$                                        | 0.79               | 0.66               | 0.85               | 0.94               |
| Pseudo-second-order   | $K_2$ ( $\text{g mg}^{-1} \text{min}^{-1}$ ) | $1 \times 10^{-5}$ | $6 \times 10^{-5}$ | $2 \times 10^{-5}$ | $1 \times 10^{-5}$ |
|                       | $R^2$                                        | 0.95               | 1.00               | 0.99               | 0.94               |

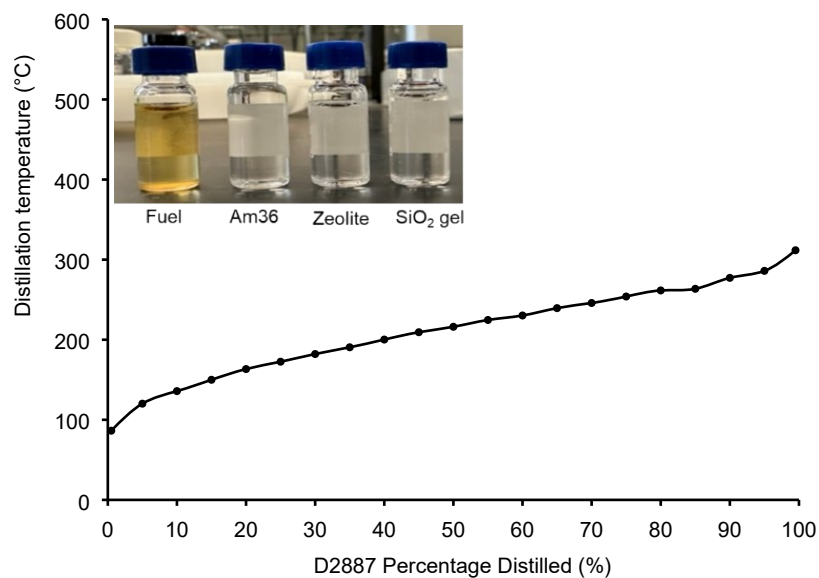**Figure S6.** SAF property, inserted with photo of SAF treated with Am36, Zeolite, and Silica gel, SAF/adsorbent at 2:1 by weight, 20 °C 24 h.**Table S2.** Property of the fuel fraction for adsorption test.

| Fuel Fractions | Average N, ppm | Average S, ppm | Density, g/ml |
|----------------|----------------|----------------|---------------|
| SAF            | 336            | 237            | 0.784         |

**Table S3.** N and S concentration and removal after treatment with different adsorbents, surrogate fuel/adsorbent at 2/1, RT for 24 h.

| Adsorbents | N after, ppm | N removal, % | S after, ppm | S removal, % |
|------------|--------------|--------------|--------------|--------------|
| Am36       | 0.8          | 99.8         | 184          | 22.2         |
| Zeolite    | 1.2          | 99.6         | 132          | 44.3         |
| Silica gel | 2.3          | 99.3         | 138          | 41.7         |
| AC         | 69.4         | 79.3         | 107          | 54.8         |

**Table S4.** BET analysis results for Silica gel after post-calcination.

| Calcine T, C            | BET, m <sup>2</sup> /g | Pore Size, nm | Pore Volume, cm <sup>3</sup> /g |
|-------------------------|------------------------|---------------|---------------------------------|
| SiO <sub>2</sub> -fresh | 431.6                  | 10.0          | 0.92                            |
| SiO <sub>2</sub> -450   | 432.6                  | 9.51          | 0.93                            |
| SiO <sub>2</sub> -500   | 440.8                  | 9.53          | 0.95                            |
| SiO <sub>2</sub> -550   | 430.9                  | 9.58          | 0.96                            |
| SiO <sub>2</sub> -600   | 394.4                  | 9.43          | 0.86                            |

**Table S5.** BET analysis results for Silica gel after post-calcination for 5 cycles.

| Calcine T, °C             | BET, m <sup>2</sup> /g | Pore Size, nm | Pore Volume, cm <sup>3</sup> /g | Pyridine Removal, % | Indole Removal, % |
|---------------------------|------------------------|---------------|---------------------------------|---------------------|-------------------|
| SiO <sub>2</sub> -fresh   | 431.6                  | 10.0          | 0.92                            | 98.44               | 81.77             |
| SiO <sub>2</sub> -450-1st | 437.2                  | 10.0          | 0.91                            | 97.74               | 75.54             |
| SiO <sub>2</sub> -450-2nd | 425.6                  | 10.0          | 0.91                            | 98.09               | 75.06             |
| SiO <sub>2</sub> -450-3rd | 433.9                  | 10.0          | 0.89                            | 98.26               | 76.02             |
| SiO <sub>2</sub> -450-4th | 428.4                  | 9.50          | 0.89                            | 97.57               | 71.70             |

Note: The adsorption process involved treating 1000 ppm N from pyridine and 500 ppm N from indole, with a fuel/adsorbent ratio of 10:1, at 40 °C for 24 h.
